# Supplementary material for: Characterization of the bond between hydrogen and the non-nuclear attractor in anionic water clusters
Source: Royal Society of Chemistry journal article supplement (doi:10.1039/b811028j), 2008-01-01
Supplement: b811028j.pdf [file b811028j.pdf]

## Characterization of the bond between hydrogen and the non-nuclear attractor in anionic water clusters

Alexis Taylor and Russell Jaye Boyd

*Department of Chemistry, Dalhousie University, Halifax, NS, Canada B3H 4J3*

Corresponding author e-mail: [Russell.Boyd@dal.ca](mailto:Russell.Boyd@dal.ca)

### Supplementary Information

#### Structural coordinates for the optimized anionic water clusters

##### Tetramer, $(H_2O)_4^-$

| Atom | Coordinates (Angstroms) |             |             |
|------|-------------------------|-------------|-------------|
|      | X                       | Y           | Z           |
| H    | -1.49754000             | -0.42692600 | -0.15214100 |
| H    | -0.42692600             | 1.49754000  | -0.15214100 |
| H    | 1.49754000              | 0.42692600  | -0.15214100 |
| H    | 0.42692600              | -1.49754000 | -0.15214100 |
| O    | -1.40132500             | -1.40132500 | -0.08800200 |
| O    | -1.40132500             | 1.40132500  | -0.08800200 |
| O    | 1.40132500              | 1.40132500  | -0.08800200 |
| O    | 1.40132500              | -1.40132500 | -0.08800200 |
| H    | -1.52811800             | -1.56364600 | 0.85615400  |
| H    | -1.56364600             | 1.52811800  | 0.85615400  |
| H    | 1.52811800              | 1.56364600  | 0.85615400  |
| H    | 1.56364600              | -1.52811800 | 0.85615400  |

##### Hexamer, $(H_2O)_6^-$

| Atom | Coordinates (Angstroms) |             |             |
|------|-------------------------|-------------|-------------|
|      | X                       | Y           | Z           |
| O    | 1.80705500              | -1.68015600 | 2.35652600  |
| H    | 1.99080800              | -1.29078200 | 1.49323900  |
| H    | 0.98350800              | -2.17833600 | 2.20336400  |
| H    | -1.17488300             | -2.19353800 | 1.29120700  |
| O    | -0.94082600             | -2.43701600 | 2.19485400  |
| H    | -0.96902000             | -1.58514000 | 2.66748900  |
| H    | -0.36561300             | 0.67894500  | 2.69525200  |
| O    | -0.21240300             | 0.04384900  | 3.40505600  |
| H    | 0.64598600              | -0.35125800 | 3.16645600  |
| H    | -2.00045400             | 1.25494200  | -1.51079500 |
| O    | -1.82325400             | 1.61998200  | -2.38600200 |
| H    | -1.32572600             | 0.90683600  | -2.82618300 |
| O    | 0.89105400              | 2.47769100  | -2.16993900 |
| H    | 1.14523800              | 2.21776700  | -1.27636800 |
| H    | -0.08257000             | 2.44464300  | -2.14106100 |
| H    | 0.74781600              | 0.76325000  | -3.07006700 |
| O    | 0.27837500              | -0.02435000 | -3.40049400 |
| H    | 0.40490500              | -0.66733100 | -2.69253400 |

**Octamer,  $(H_2O)_8^-$**

| Atom | Coordinates (Angstroms) |             |             |
|------|-------------------------|-------------|-------------|
|      | X                       | Y           | Z           |
| H    | 3.11304700              | 1.40958800  | 0.63181600  |
| H    | 3.11261700              | -0.63185400 | 1.40939300  |
| H    | 3.11301800              | -1.40959200 | -0.63181900 |
| H    | 3.11261400              | 0.63184800  | -1.40939500 |
| O    | 3.07587700              | 1.95428800  | -0.18365200 |
| O    | 3.07437700              | 0.18367700  | 1.95391100  |
| O    | 3.07584400              | -1.95429300 | 0.18365000  |
| O    | 3.07435800              | -0.18368200 | -1.95391500 |
| H    | 2.16445700              | 2.26592300  | -0.20110400 |
| H    | 2.16242100              | 0.20097300  | 2.26401200  |
| H    | 2.16441800              | -2.26591100 | 0.20110700  |
| H    | 2.16239800              | -0.20096700 | -2.26400500 |
| O    | -3.07504900             | -1.22875500 | 1.53047700  |
| O    | -3.07516900             | -1.53050000 | -1.22876600 |
| O    | -3.07518100             | 1.53050300  | 1.22876800  |
| O    | -3.07505700             | 1.22875700  | -1.53047500 |
| H    | -3.11284900             | 1.52457200  | 0.24815200  |
| H    | -3.11281100             | 0.24814500  | -1.52456400 |
| H    | -3.11283000             | -1.52456900 | -0.24814900 |
| H    | -3.11280900             | -0.24814300 | 1.52456700  |
| H    | -2.16334400             | 1.41429900  | -1.78041900 |
| H    | -2.16351100             | 1.78054000  | 1.41438900  |
| H    | -2.16333700             | -1.41429300 | 1.78042700  |
| H    | -2.16349900             | -1.78053300 | -1.41439300 |

**Decamer,  $(H_2O)_{10}^-$**

| Atom | Coordinates (Angstroms) |             |             |
|------|-------------------------|-------------|-------------|
|      | X                       | Y           | Z           |
| O    | 0.73377300              | 2.22355100  | 3.14024600  |
| O    | 1.88797400              | 1.38497500  | -3.14024600 |
| O    | -1.88797400             | 1.38497500  | 3.14024600  |
| O    | -1.90060500             | -1.36759000 | 3.14024600  |
| O    | 0.71333600              | -2.23019100 | 3.14024600  |
| O    | 2.34147100              | -0.01074500 | 3.14024600  |
| O    | 1.90060500              | -1.36759000 | -3.14024600 |
| O    | -0.71333600             | -2.23019100 | -3.14024600 |
| O    | -2.34147100             | -0.01074500 | -3.14024600 |
| O    | -0.73377300             | 2.22355100  | -3.14024600 |
| H    | -0.20265700             | 1.93068000  | 3.19090500  |
| H    | -1.89881000             | 0.40387500  | 3.19090500  |
| H    | -0.97087200             | -1.68107200 | 3.19090500  |
| H    | 1.29877800              | -1.44283400 | 3.19090500  |
| H    | 1.77356100              | 0.78935100  | 3.19090500  |
| H    | 0.81531600              | 2.55765600  | 2.24185300  |
| H    | -2.18052900             | 1.56577100  | 2.24185300  |
| H    | -2.16295700             | -1.58995600 | 2.24185300  |
| H    | 0.84374800              | -2.54841800 | 2.24185300  |
| H    | 2.68442200              | 0.01494800  | 2.24185300  |
| H    | 1.89881000              | 0.40387500  | -3.19090500 |
| H    | 0.97087200              | -1.68107200 | -3.19090500 |
| H    | -1.29877800             | -1.44283400 | -3.19090500 |

Electronic Supplementary Material for PCCP  
This journal is © The Owner Societies 2008

|   |             |             |             |
|---|-------------|-------------|-------------|
| H | -1.77356100 | 0.78935100  | -3.19090500 |
| H | 0.20265700  | 1.93068000  | -3.19090500 |
| H | 2.18052900  | 1.56577100  | -2.24185300 |
| H | 2.16295700  | -1.58995600 | -2.24185300 |
| H | -0.84374800 | -2.54841800 | -2.24185300 |
| H | -2.68442200 | 0.01494800  | -2.24185300 |
| H | -0.81531600 | 2.55765600  | -2.24185300 |
